# Supplementary material for: Cytokine Profiles in Malawian Children Presenting with Uncomplicated Malaria, Severe Malarial Anemia, and Cerebral Malaria
Source: PubMed Central journal article supplement (PMC5382826; doi:10.1128/cvi.00533-16), 2017-04-05
Supplement: CVI.00533-16_zcd999095458s1.pdf [file CVI.00533-16_zcd999095458s1.pdf]

**Table S1:** Cytokine concentrations (pg/ml) and ratios in controls and patients of different malaria types during acute infection and in convalescence.

| Cytokine<br>(limit of detection) | Medians (10 <sup>th</sup> and 90 <sup>th</sup> percentiles) |                          |                       |                         |                       |                          |                       |
|----------------------------------|-------------------------------------------------------------|--------------------------|-----------------------|-------------------------|-----------------------|--------------------------|-----------------------|
|                                  | Control                                                     | UCM                      |                       | SMA                     |                       | CM                       |                       |
|                                  | (n = 42)                                                    | Acute (n = 54)           | Follow-up (n = 34)    | Acute (n = 30)          | Follow-up (n = 21)    | Acute (n = 29)           | Follow-up (n = 18)    |
| IFN- $\gamma$<br>(7.2)           | 2.32<br>(1.35- 8.66)                                        | 5.86<br>(2.42- 17.07)    | 1.91<br>(1.10- 5.58)  | 4.43<br>(1.74- 36.19)   | 1.80<br>(1.22- 3.35)  | 17.28<br>(2.02- 55.03)   | 1.89<br>(1.13- 5.76)  |
| TNF- $\alpha$<br>(2.8)           | 1.41<br>(1.12- 1.76)                                        | 2.12<br>(1.22- 6.35)     | 1.50<br>(1.26- 2.21)  | 2.95<br>(1.42- 8.28)    | 1.80<br>(1.19- 2.63)  | 3.76<br>(1.90- 13.41)    | 1.69<br>(1.18- 2.44)  |
| IL-1 $\beta$<br>(7.2)            | 1.89<br>(1.37- 2.50)                                        | 2.46<br>(1.45- 4.09)     | 2.00<br>(1.30- 4.22)  | 2.21<br>(1.44- 5.40)    | 3.34<br>(1.90- 4.03)  | 2.48<br>(1.68- 5.08)     | 3.09<br>(1.65- 4.66)  |
| IL-2<br>(2.6)                    | 2.12<br>(1.46- 2.60)                                        | 2.02<br>(1.37- 2.67)     | 1.60<br>(1.20- 3.70)  | 2.55<br>(1.67- 5.20)    | 1.30<br>(1.20- 3.20)  | 3.34<br>(1.70- 5.70)     | 1.65<br>(1.20- 3.60)  |
| IL-4<br>(2.6)                    | 1.41<br>(1.14- 1.78)                                        | 1.49<br>(1.15- 2.39)     | 1.80<br>(1.20- 3.30)  | 2.03<br>(1.36- 5.10)    | 1.50<br>(1.20- 2.60)  | 3.62<br>(1.49- 17.83)    | 1.60<br>(1.10- 3.20)  |
| IL-5<br>(2.6)                    | 1.49<br>(1.17- 2.29)                                        | 1.54<br>(1.19- 2.08)     | 1.60<br>(1.12- 3.51)  | 1.55<br>(1.19- 2.20)    | 1.60<br>(1.14- 4.39)  | 1.74<br>(1.20- 5.07)     | 1.46<br>(1.09- 2.80)  |
| IL-6<br>(2.6)                    | 2.37<br>(1.71- 9.87)                                        | 17.31<br>(2.65- 168.0)   | 1.90<br>(1.18- 6.14)  | 12.20<br>(2.83- 403.7)  | 2.09<br>(1.30- 8.37)  | 156.3<br>(26.90- 459.4)  | 1.87<br>(1.24- 5.30)  |
| IL-8<br>(3.5)                    | 6.55<br>(2.38- 15.45)                                       | 8.47<br>(2.33- 51.84)    | 4.60<br>(2.69- 10.98) | 13.03<br>(5.79- 59.16)  | 4.70<br>(2.63- 10.59) | 29.71<br>(10.12- 152.1)  | 4.71<br>(2.85- 11.54) |
| IL-10<br>(2.8)                   | 4.50<br>(2.25- 9.04)                                        | 89.19<br>(9.82- 1,306.0) | 4.13<br>(1.76- 33.67) | 64.40<br>(11.81- 669.1) | 4.50<br>(2.08- 50.22) | 533.20<br>(26.48- 2,415) | 4.64<br>(1.66- 43.99) |
| IL-12p70<br>(1.9)                | 1.52<br>(1.14- 1.90)                                        | 1.55<br>(1.13- 3.24)     | 1.85<br>(1.46- 3.08)  | 1.65<br>(1.24- 2.65)    | 2.13<br>(1.15- 2.87)  | 1.84<br>(1.34- 2.59)     | 2.09<br>(1.20- 2.92)  |
| IL-10:TNF- $\alpha$              | 3.47<br>(1.87- 6.31)                                        | 43.25<br>(9.97- 486.0)   | 2.10<br>(1.06- 20.20) | 25.16<br>(6.94- 123.5)  | 2.60<br>(1.38- 19.54) | 140.2<br>(15.8- 417.4)   | 3.65<br>(1.71- 29.83) |
| IL-10:IL-6                       | 1.63<br>(0.60- 3.63)                                        | 4.58<br>(1.51- 15.85)    | 2.20<br>(0.81- 14.09) | 3.92<br>(1.35- 7.90)    | 2.20<br>(0.92- 6.20)  | 2.93<br>(0.58- 8.44)     | 2.20<br>(0.9- 7.75)   |
